# Supplementary material for: Coupling of store-operated calcium entry to vasoconstriction is acid-sensing ion channel 1a dependent in pulmonary but not mesenteric arteries
Source: PubMed Central journal article supplement (PMC7377459; doi:10.1371/journal.pone.0236288), 2020-07-23
Supplement: pone.0236288.s001.pdf [file pone.0236288.s001.pdf]

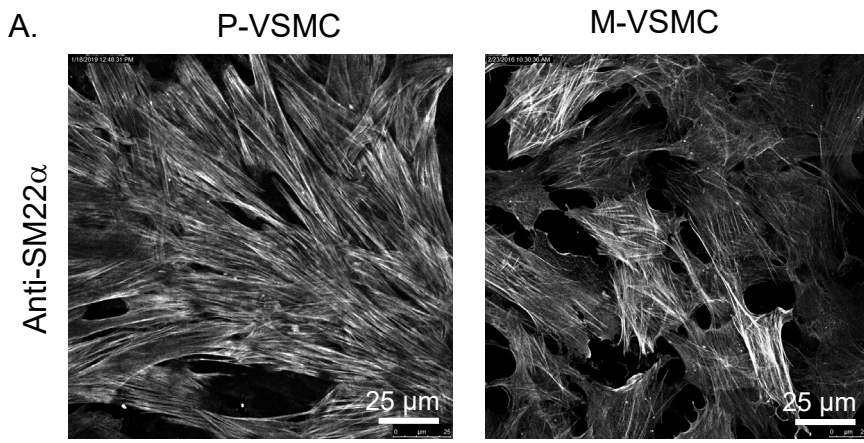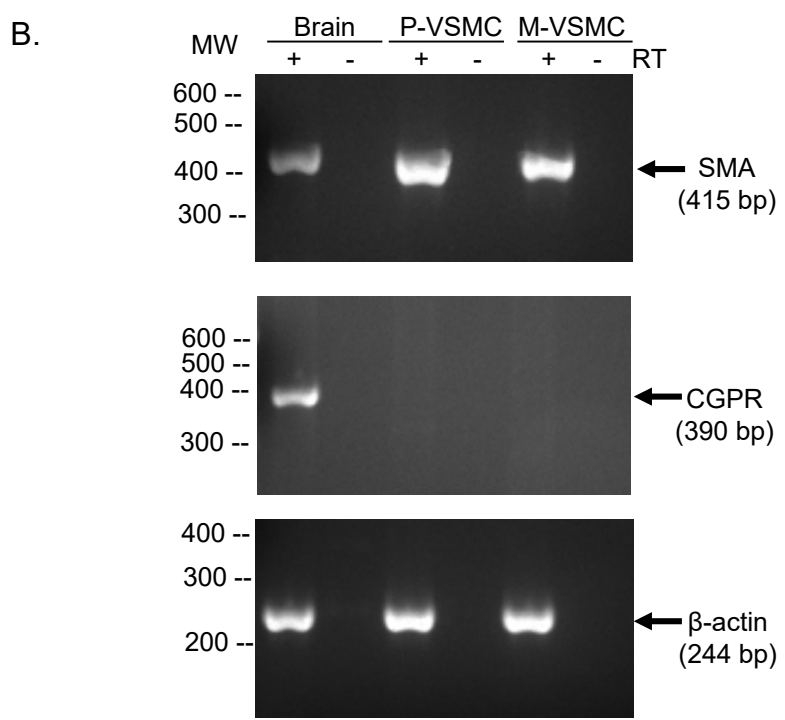

**Figure S1: Primary pulmonary and mesenteric VSMC homogeneity is verified by morphological appearance and presence of smooth muscle marker.** A: representative immunofluorescence images of pulmonary and mesenteric VSMC stained for smooth muscle 22 $\alpha$ . B: representative PCR gels showing expression of smooth muscle  $\alpha$  actin (F: 5'-ACTGCTGCTTCCTCTTCTTC-3'; R: 5'-GGCCAGCTTCGTCATACTCC-3'), calcitonin gene-related peptide (F: 5'-GTTCTCCCCTTTCCTGGTTG-3'; R: 5'-CTGGGGCTGTTATCTGTTCA-3') and  $\beta$ -actin.
