# Supplementary material for: Coupling of store-operated calcium entry to vasoconstriction is acid-sensing ion channel 1a dependent in pulmonary but not mesenteric arteries
Source: PubMed Central journal article supplement (PMC7377459; doi:10.1371/journal.pone.0236288), 2020-07-23
Supplement: pone.0236288.s002.pdf [file pone.0236288.s002.pdf]

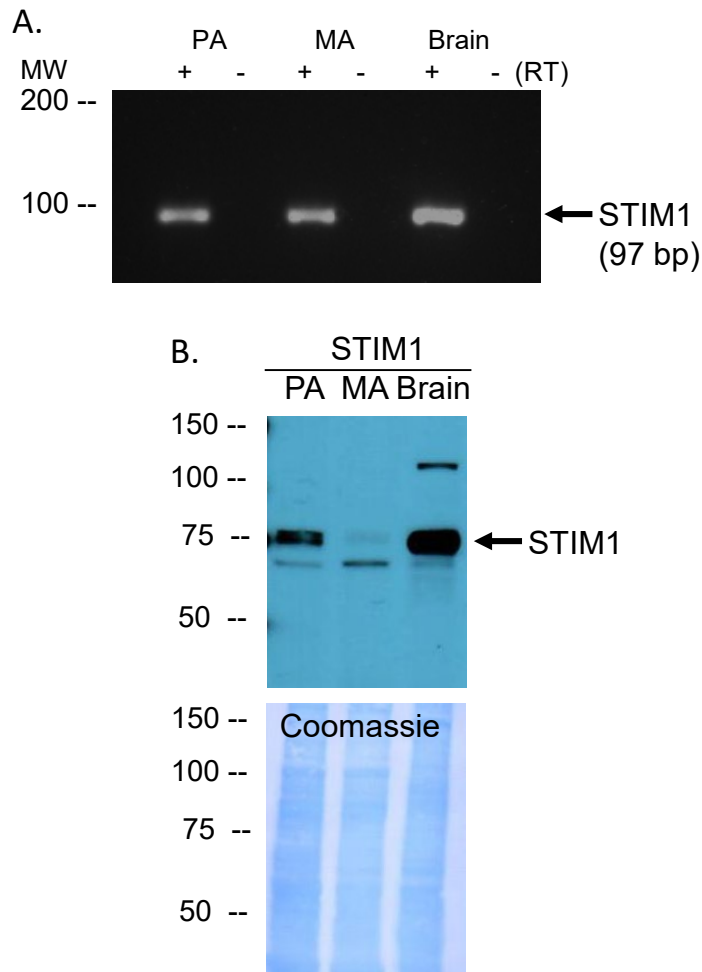

**Figure S2: STIM1 is expressed in both pulmonary and mesenteric isolated arteries.** Representative A: PCR gel showing mRNA expression of STIM1 in pulmonary (PA) and mesenteric (MA) arteries and brain (positive control; F: 5'-ATGCCAATGGTGATGTGGAT-3'; R: 5'-CCATGGAAGGTGCTGTGTTT-3'). B: Representative western blot showing protein expression in PA, MA and brain (top; Abcam: ab108994; expected MW 77 kDa), Coomassie blue was used to measure even loading (B-bottom).
