# Supplementary material for: Coupling of store-operated calcium entry to vasoconstriction is acid-sensing ion channel 1a dependent in pulmonary but not mesenteric arteries
Source: PubMed Central journal article supplement (PMC7377459; doi:10.1371/journal.pone.0236288), 2020-07-23
Supplement: pone.0236288.s003.pdf [file pone.0236288.s003.pdf]

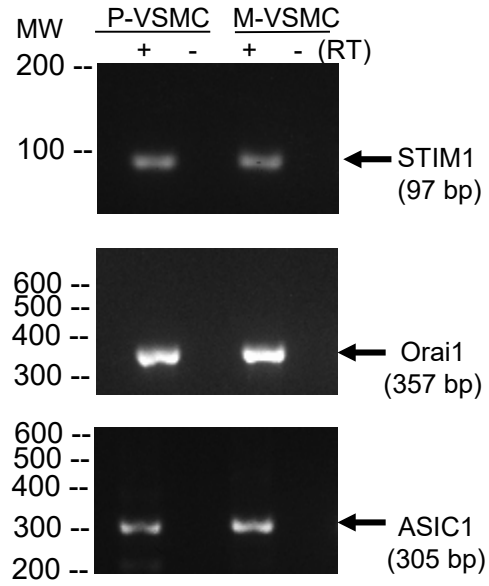

**Figure S3: STIM1, Orai1 and ASIC1 are expressed in both pulmonary and mesenteric VSMC.** Representative PCR gel showing mRNA expression of STIM1, Orai1 and ASIC1 in both pulmonary and mesenteric primary cultured VSMC.
