# Supplementary material for: Coupling of store-operated calcium entry to vasoconstriction is acid-sensing ion channel 1a dependent in pulmonary but not mesenteric arteries
Source: PubMed Central journal article supplement (PMC7377459; doi:10.1371/journal.pone.0236288), 2020-07-23
Supplement: pone.0236288.s004.pdf [file pone.0236288.s004.pdf]

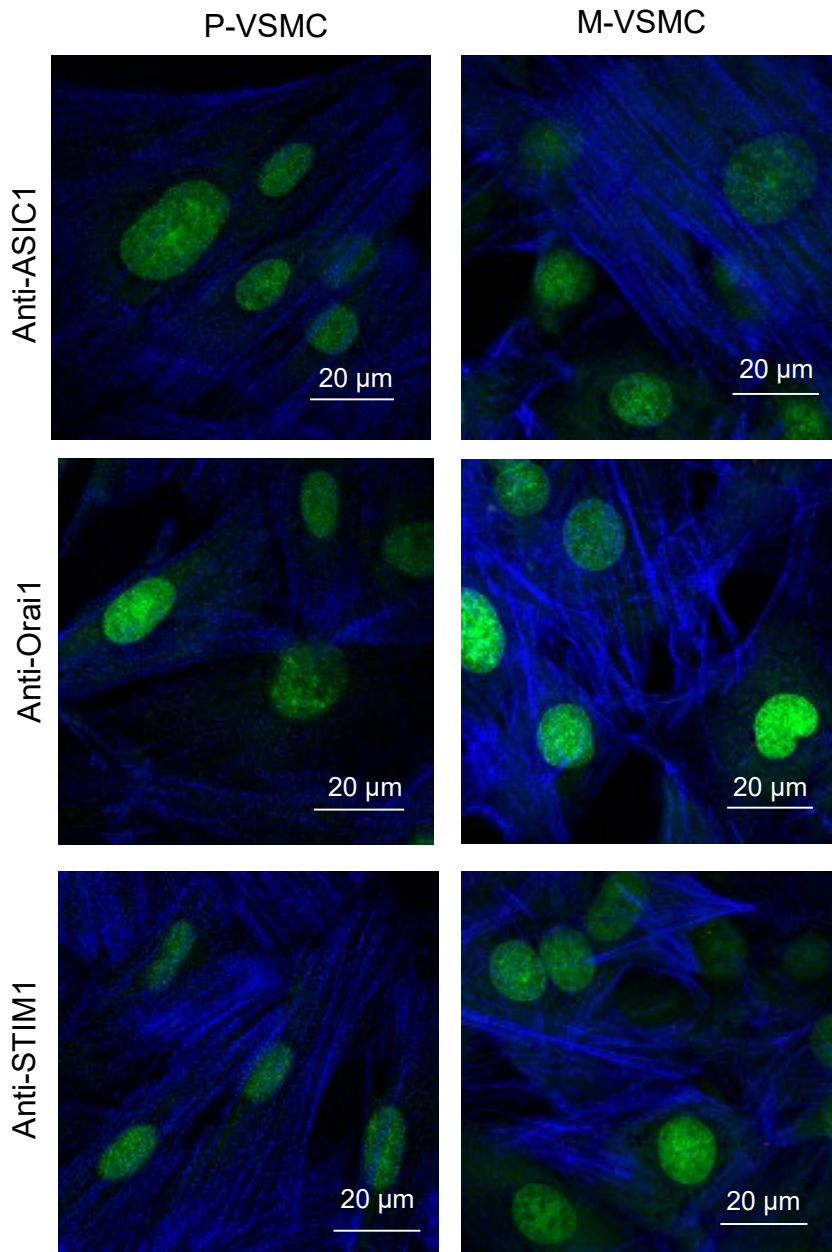

**Figure S4: Negative control proximity ligation assay experiments.** Representative images of negative control experiments where each primary antibody was incubated individually with subsequent incubation with probes.
