# Supplementary material for: Coupling of store-operated calcium entry to vasoconstriction is acid-sensing ion channel 1a dependent in pulmonary but not mesenteric arteries
Source: PubMed Central journal article supplement (PMC7377459; doi:10.1371/journal.pone.0236288), 2020-07-23
Supplement: pone.0236288.s005.pdf [file pone.0236288.s005.pdf]

# Raw gel images from Figure 2A

1 2 3 4 5 6 7 8 9 10 11 12  
X X X X

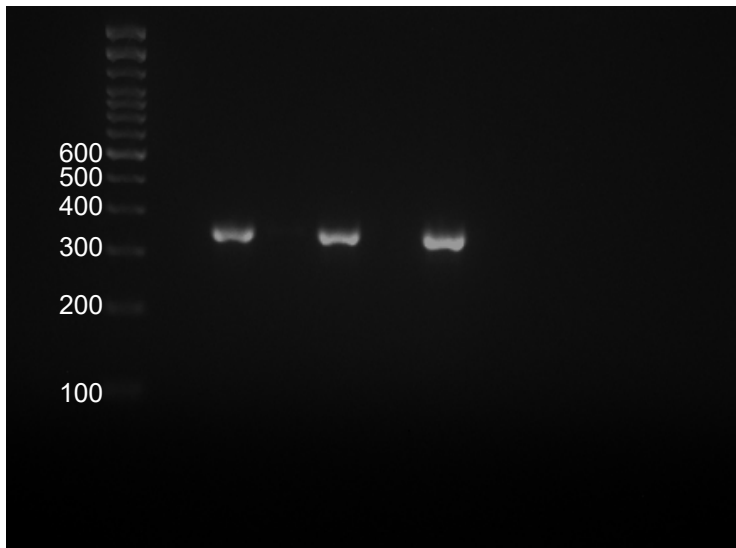

## Orai1

|                                                                |                     |
|----------------------------------------------------------------|---------------------|
| Orai1<br>Primer Pair Sequence                                  | Product<br>Size, bp |
| F: 5'-ACGTCCACAACCTCAACTCC-3'<br>R: 5'-ACTGTCGGTCCGTCTTATGG-3' | 357 bp              |

PCR products were separated using gel electrophoresis on a 3% agarose gel and stained with ethidium bromide for visualization under UV light.

1 2 3 4 5 6 7 8 9 10 11 12  
X X X X

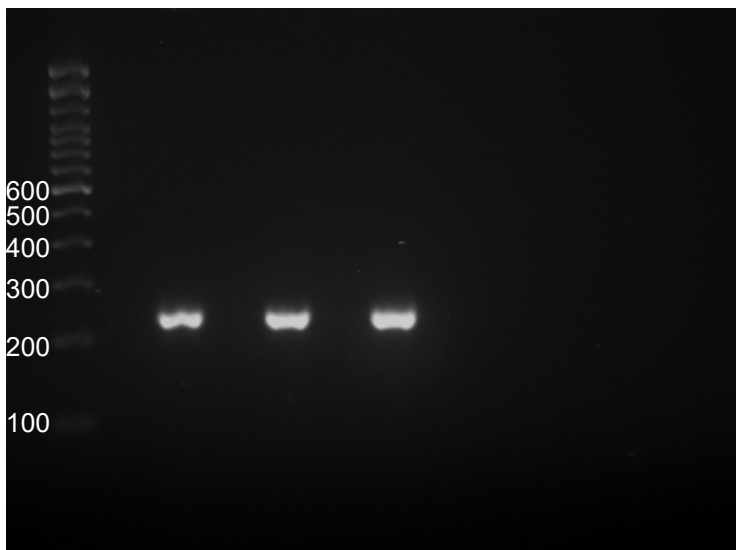

## $\beta$ -actin

|                                                                |                     |
|----------------------------------------------------------------|---------------------|
| $\beta$ -actin<br>Primer Pair Sequence                         | Product<br>Size, bp |
| F: 5'-AGTGTGACGTTGACATCCGT-3'<br>R: 5'-GACTCATCGTACTCCTGCTT-3' | 244 bp              |

PCR products were separated using gel electrophoresis on a 3% agarose gel and stained with ethidium bromide for visualization under UV light.

1. Molecular weight marker
2. Blank
3. Pulmonary artery + reverse transcriptase
4. Pulmonary artery - reverse transcriptase
5. Mesenteric artery + reverse transcriptase
6. Mesenteric artery - reverse transcriptase
7. Brain tissue + reverse transcriptase
8. Brain tissue - reverse transcriptase
9. Blank
10. Blank
11. Blank
12. Blank

# Raw gel images from Figure 2A

X X X X

1 2 3 4 5 6 7 8 9 10 11 12

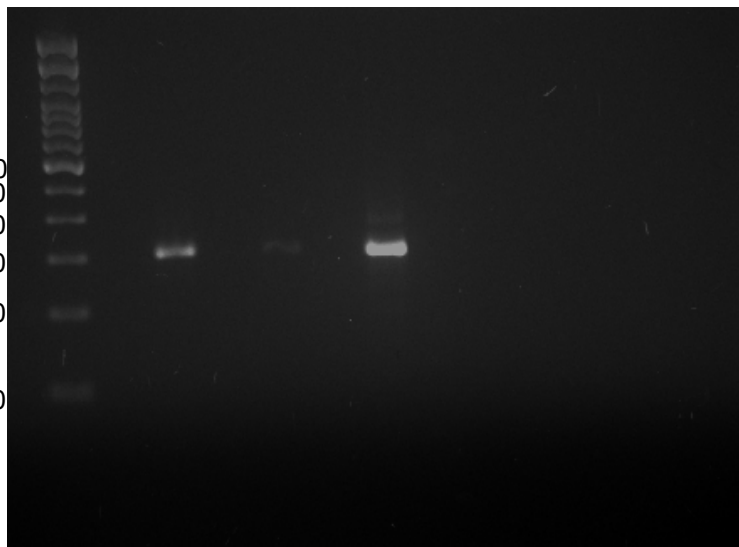

## ASIC1: Even Loading

| ASIC1 Primer Pair Sequence    | Product Size, bp |
|-------------------------------|------------------|
| F: 5'-GCCTATGAGATCGCAGGG-3'   | 305 bp           |
| R: 5'-AAAGTCCTCAAACGTGCCTC-3' |                  |

PCR products were separated using gel electrophoresis on a 3% agarose gel and stained with ethidium bromide for visualization under UV light. ASIC1 transcript Fig. 2b (even loading).

1 2 3 4 5 6 7 8 9 10 11 12

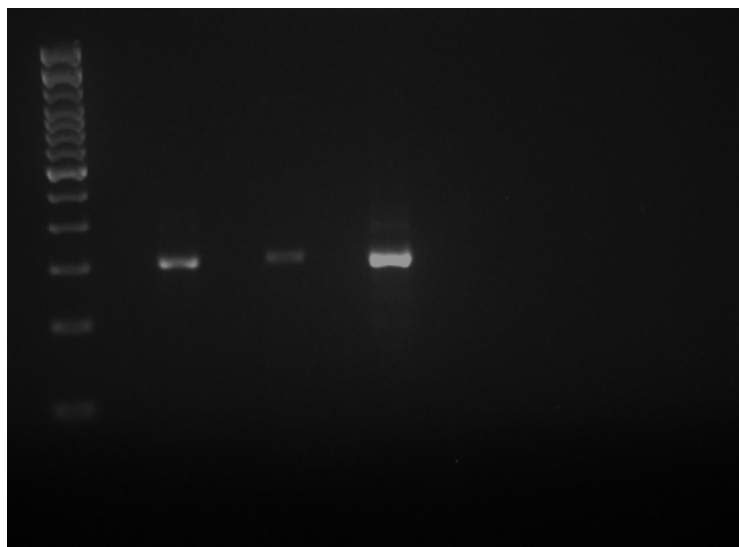

## Uneven Loading

(Gel shown for reviewers, not shown in manuscript)

Uneven loading of ASIC1 transcript from above. Pulmonary and brain samples were loaded with 5 $\mu$ l cDNA while mesenteric was loaded with 15 $\mu$ l cDNA. Shown here to help visualize mesenteric band.

1. Molecular weight marker
2. Blank
3. Pulmonary artery + reverse transcriptase
4. Pulmonary artery - reverse transcriptase
5. Mesenteric artery + reverse transcriptase
6. Mesenteric artery - reverse transcriptase
7. Brain tissue + reverse transcriptase
8. Brain tissue - reverse transcriptase
9. Blank
10. Blank
11. Blank
12. Blank

# Raw blot images from Figure 2B –ORAI1

Anti-Orai1 (Proteintech #14443-1-AP) 1.5 hrs @ 1:300; expected MW 35-44 kDa

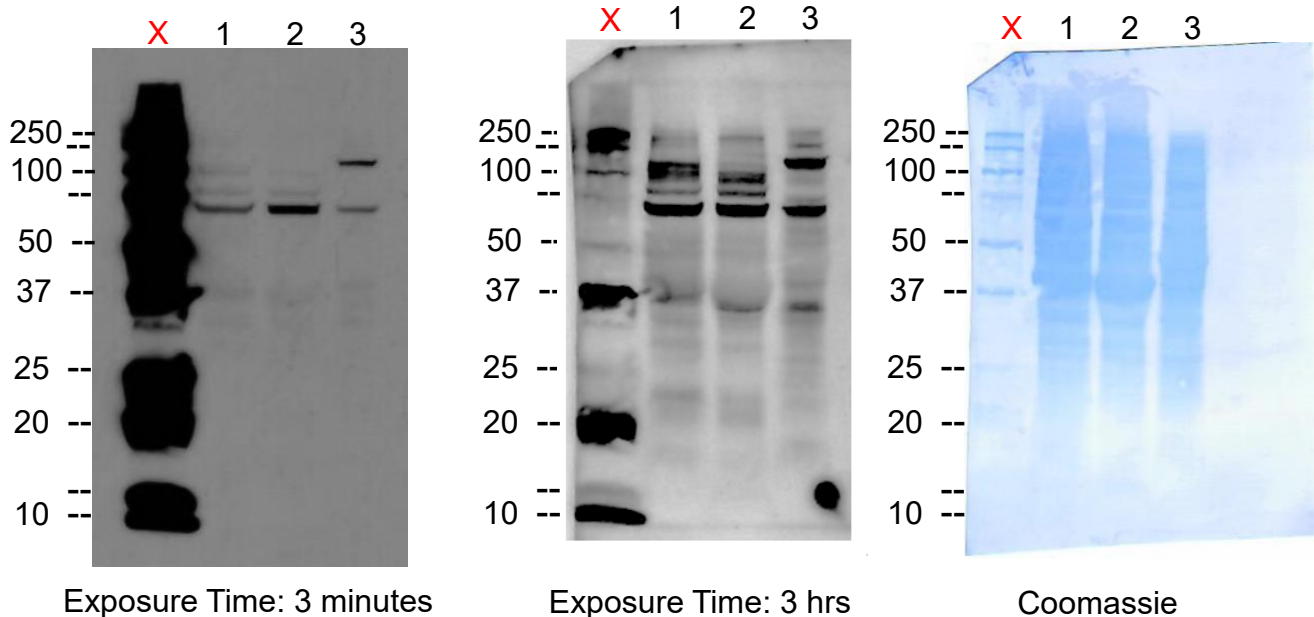

Anti-Orai1 (Alomone #ACC-0621:100; overnight @ 1:100; expected MW not reported)

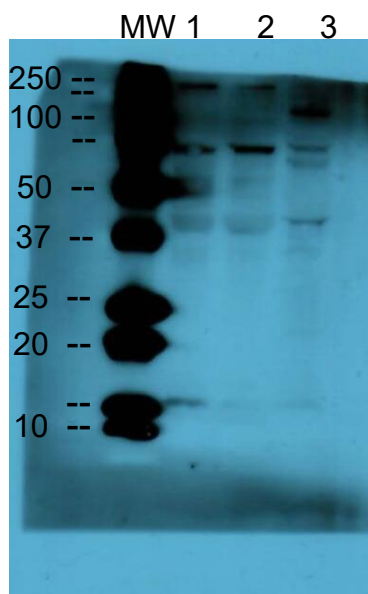

(Gel shown for reviewers, not shown in manuscript)

1. Pulmonary artery
2. Mesenteric artery
3. Brain tissue

Western blots were incubated with -horseradish peroxidase, followed by chemiluminescence labeling. Proteins were detected by exposing the blot to chemiluminescence-sensitive film. Blots were then stained with Coomassie blue to use as loading control.

Exposure Time: 1 minutes

# Raw western blot images from Figure 2B – ASIC1

Anti-ASIC1 (Millipore: AB5674P) 48 hrs @ 1:500; reported MW ~60 and ~100 kDa

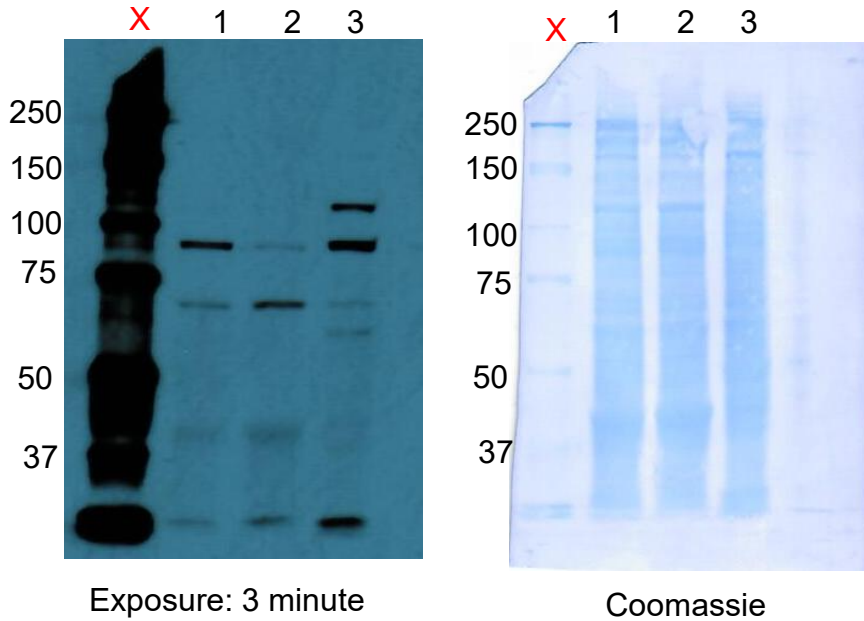

1. Pulmonary artery
2. Mesenteric artery
3. Brain tissue

Western blots were incubated with -horseradish peroxidase, followed by chemiluminescence labeling. Proteins were detected by exposing the blot to chemiluminescence-sensitive film. Blots were then stained with Coomassie blue to use as loading control.

# Raw gel images from Figure S1B

1 2 3 4 5 6 7 8 9 10 11 12  
X X X X

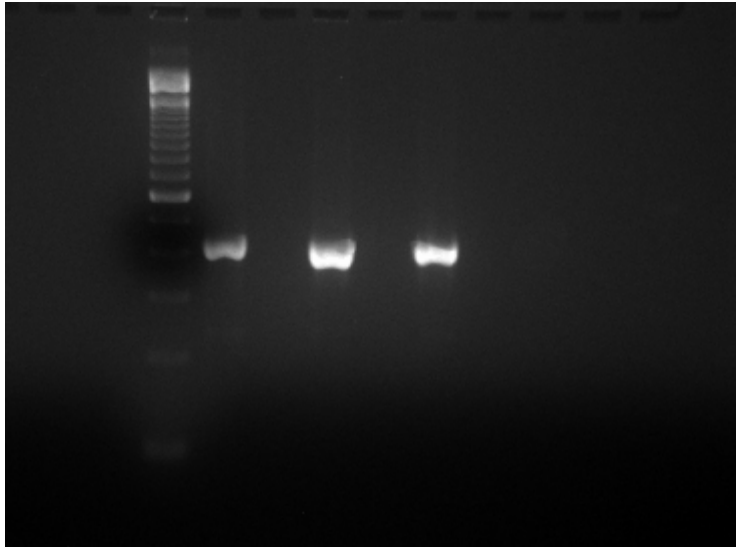

## Smooth Muscle $\alpha$ -actin (SMA)

|                               |                  |
|-------------------------------|------------------|
| SMA                           | Product Size, bp |
| Primer Pair Sequence          | 415 bp           |
| F: 5'-ACTGCTGCTTCCTTCTTC-3'   |                  |
| R: 5'-GGCCAGCTTCGTCATACTCC-3' |                  |

PCR products were separated using gel electrophoresis on a 3% agarose gel and stained with ethidium bromide for visualization under UV light.

1 2 3 4 5 6 7 8 9 10 11 12  
X X X X

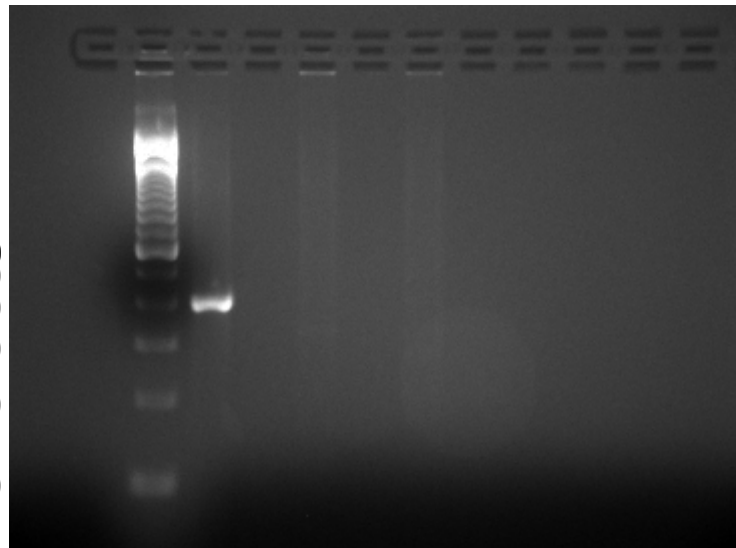

## calcitonin gene-related peptide (CGRP)

|                               |                  |
|-------------------------------|------------------|
| CGRP                          | Product Size, bp |
| Primer Pair Sequence          | 390 bp           |
| F: 5'-TTCTCCCTTTCCTGGTTG-3'   |                  |
| R: 5'-CTGGGGCTGTTATCTGTTCA-3' |                  |

PCR products were separated using gel electrophoresis on a 3% agarose gel and stained with ethidium bromide for visualization under UV light.

1. Blank
2. Molecular weight marker
3. Brain tissue + reverse transcriptase
4. Brain tissue - reverse transcriptase
5. Pulmonary VSMC + reverse transcriptase
6. Pulmonary VSMC - reverse transcriptase
7. Mesenteric VSMC+ reverse transcriptase
8. Mesenteric VSMC- reverse transcriptase
9. Blank
10. Blank
11. Blank
12. Blank

# Raw gel image from Figure S1B

X X X X

1 2 3 4 5 6 7 8 9 10 11 12

## $\beta$ -actin

| $\beta$ -actin<br>Primer Pair Sequence                         | Product<br>Size, bp |
|----------------------------------------------------------------|---------------------|
| F: 5'-AGTGTGACGTTGACATCCGT-3'<br>R: 5'-GACTCATCGTACTCCTGCTT-3' | 244 bp              |

PCR products were separated using gel electrophoresis on a 3% agarose gel and stained with ethidium bromide for visualization under UV light.  $\beta$ -actin transcript Fig. S1B.

1. Blank
2. Molecular weight marker
3. Brain tissue + reverse transcriptase
4. Brain tissue - reverse transcriptase
5. Pulmonary VSMC + reverse transcriptase
6. Pulmonary VSMC - reverse transcriptase
7. Mesenteric VSMC+ reverse transcriptase
8. Mesenteric VSMC- reverse transcriptase
9. Blank
10. Blank
11. Blank
12. Blank

# Raw gel and blot images from Figure S2

1 2 3 4 5 6 7 8 9 10 11 12  
X X X X

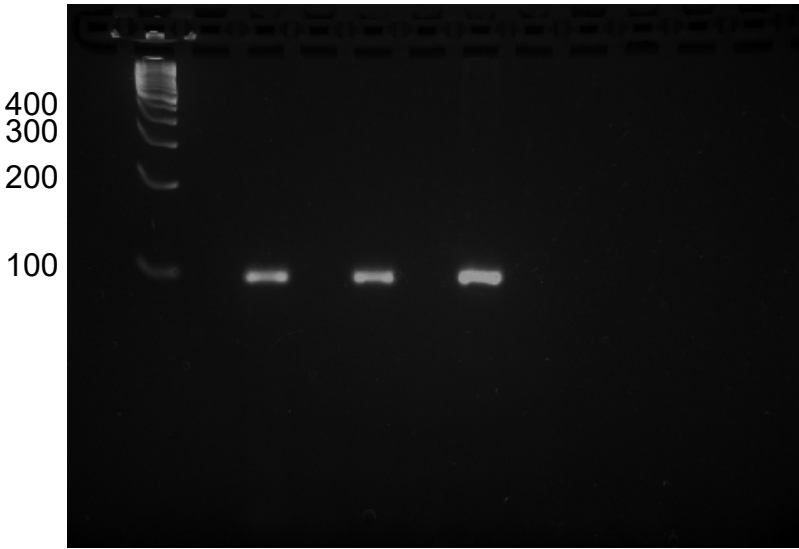

## Stromal Interaction Molecule 1

| STIM1<br>Primer Pair Sequence | Product<br>Size, bp |
|-------------------------------|---------------------|
| F: 5'-ATGCCAATGGTGATGTGGAT-3' | 97 bp               |
| R: 5'-CATGGAAGGTGCTGTGTTT-3'  |                     |

1. Molecular weight marker
2. Blank
3. Pulmonary artery + reverse transcriptase
4. Pulmonary artery - reverse transcriptase
5. Mesenteric artery + reverse transcriptase
6. Mesenteric artery - reverse transcriptase
7. Brain tissue + reverse transcriptase
8. Brain tissue - reverse transcriptase
9. Blank
10. Blank
11. Blank
12. Blank

PCR products were separated using gel electrophoresis on a 3% agarose gel and stained with ethidium bromide for visualization under UV light.

Rabbit anti-STIM1 (Abcam #ab108994, 1:500 overnight; predicted MW 77 kDa)

MW 1 2 3

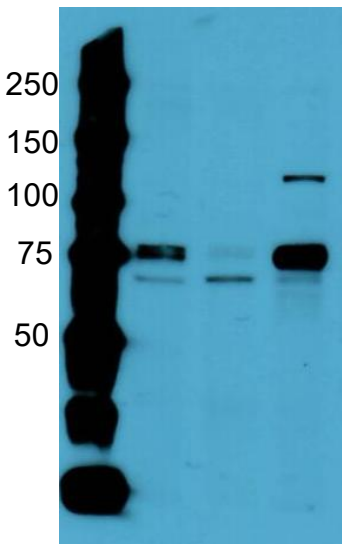

Exposure time: 1 minute

MW 1 2 3

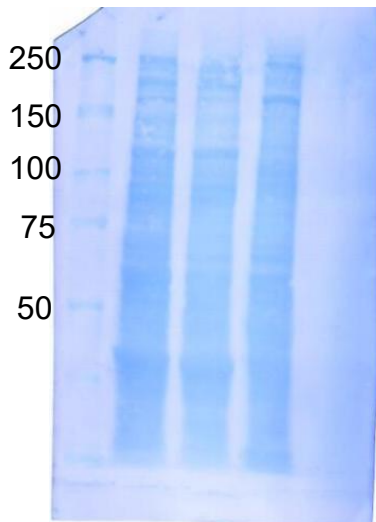

Coomassie

1. Pulmonary artery
2. Mesenteric artery
3. Brain tissue

Western blots were incubated with - horseradish peroxidase, followed by chemiluminescence labeling. Proteins were detected by exposing the blot to chemiluminescence-sensitive film. Blots were then stained with Coomassie blue to use as loading control.

# Raw gel images from Figure S3

1 2 3 4 5 6 7 8 9 10 11 12  
X X X X X X

## Orai1

| Orai1<br>Primer Pair Sequence | Product<br>Size, bp |
|-------------------------------|---------------------|
| F: 5'-ACGTCCACAACCTCAACTCC-3' | 357 bp              |
| R: 5'-ACTGTCGGTCCGTCTTATGG-3' |                     |

PCR products were separated using gel electrophoresis on a 3% agarose gel and stained with ethidium bromide for visualization under UV light.

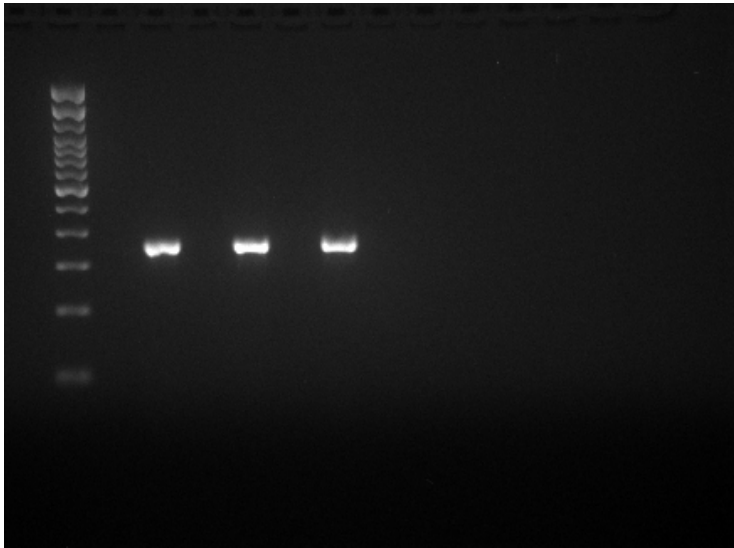

1 2 3 4 5 6 7 8 9 10 11 12  
X X X X X X

## ASIC1

| ASIC1<br>Primer Pair Sequence | Product<br>Size, bp |
|-------------------------------|---------------------|
| F: 5'-GCCTATGAGATCGCAGGG-3'   | 305 bp              |
| R: 5'-AAAGTCCTCAAACGTGCCTC-3' |                     |

PCR products were separated using gel electrophoresis on a 3% agarose gel and stained with ethidium bromide for visualization under UV light.

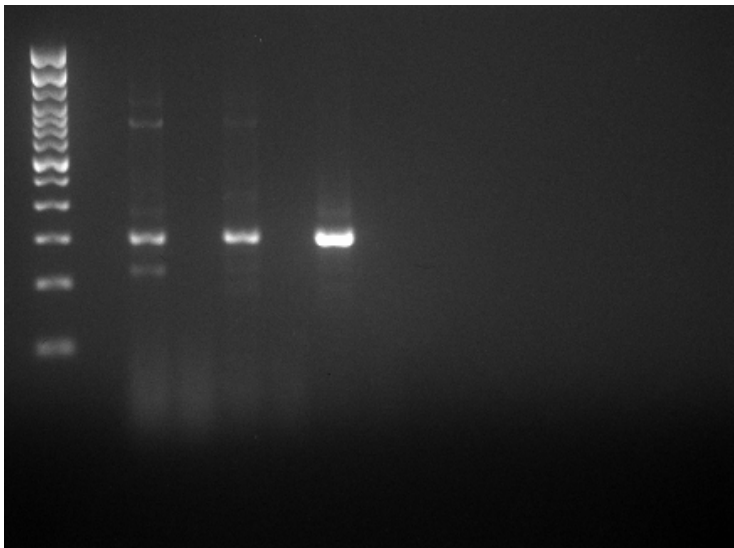

1. Molecular weight marker
2. Blank
3. Pulmonary VSMC + reverse transcriptase
4. Pulmonary VSMC - reverse transcriptase
5. Mesenteric VSMC + reverse transcriptase
6. Mesenteric VSMC - reverse transcriptase
7. Brain tissue + reverse transcriptase
8. Brain tissue - reverse transcriptase
9. Blank
10. Blank
11. Blank
12. Blank



# Raw gel images from Figure S3

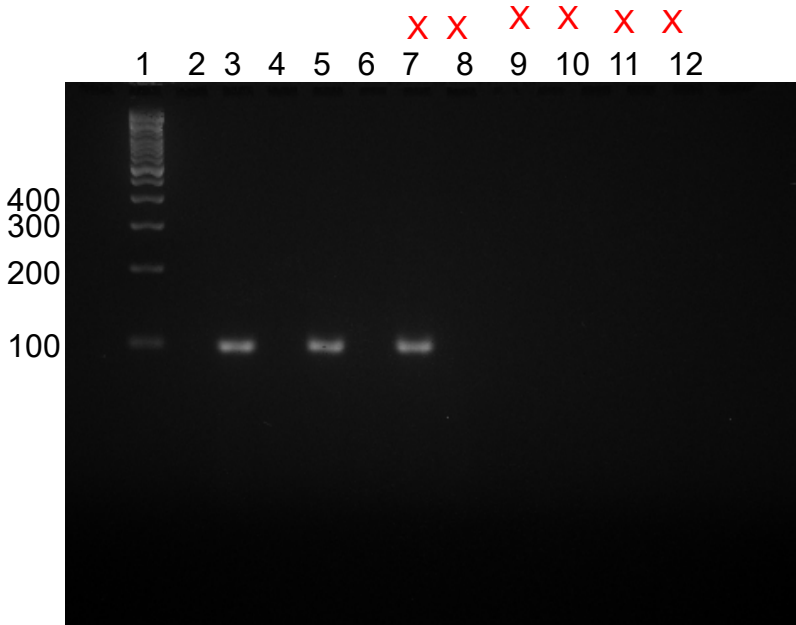

## Stromal Interaction Molecule 1

|                               |                  |
|-------------------------------|------------------|
| STIM1                         | Product Size, bp |
| Primer Pair Sequence          | 97 bp            |
| F: 5'-ATGCCAATGGTGATGTGGAT-3' |                  |
| R: 5'-CATGGAAGGTGCTGTGTTT-3'  |                  |

PCR products were separated using gel electrophoresis on a 3% agarose gel and stained with ethidium bromide for visualization under UV light. STIM1 transcript Fig. S3.

1. Molecular weight marker
2. Blank
3. Pulmonary VSMC + reverse transcriptase
4. Pulmonary VSMC - reverse transcriptase
5. Mesenteric VSMC + reverse transcriptase
6. Mesenteric VSMC - reverse transcriptase
7. Brain tissue + reverse transcriptase
8. Brain tissue - reverse transcriptase
9. Blank
10. Blank
11. Blank
12. Blank
